# Supplementary material for: Comparative study of BiVO4 and BiVO4/Ag2O regarding their properties and photocatalytic degradation mechanism
Source: Royal Society of Chemistry journal article supplement (doi:10.1039/d2nj00920j), 2022-01-01
Supplement: d2nj00920j1.pdf [file d2nj00920j1.pdf]

## **Comparative study of BiVO<sub>4</sub> and BiVO<sub>4</sub>/Ag<sub>2</sub>O on their properties and photocatalytic degradation mechanism**

Yanbin Tong<sup>a,b</sup>, Shengxin Zhao<sup>b</sup>, Jimin Shen<sup>b</sup>, Zhonglin Chen<sup>b\*</sup>, Jing Kang<sup>b\*</sup>,  
Binyuan Wang<sup>b</sup>

<sup>a</sup> Heilongjiang Provincial Key Laboratory of Oilfield Applied Chemistry and  
Technology, School of Chemical Engineering, Daqing Normal University, Daqing  
163712, China

<sup>b</sup> State Key Laboratory of Urban Water Resource and Environment, School of  
Environment, Harbin Institute of Technology, Harbin, 150090, P. R. China

E-mail address: [jingkanghit@163.com](mailto:jingkanghit@163.com) (\*for correspondence)

## **Supplementary Experimental Section:**

### *2.1.1 Synthesis of BiVO<sub>4</sub>*

BiVO<sub>4</sub> particles were synthesized by the solvothermal method. Bi(NO<sub>3</sub>)<sub>3</sub>·5H<sub>2</sub>O (1.8 g) was dissolved into the mixture solution of HNO<sub>3</sub> (1.8 mL) and 1,3-PDO (15 mL). NH<sub>4</sub>VO<sub>3</sub> (0.4 g) was dissolved into NaOH (2 mol/L, 15 mL) solution. Then, the NH<sub>4</sub>VO<sub>3</sub> solution was slowly dropped into Bi(NO<sub>3</sub>)<sub>3</sub> solution. The pH of the mixture solution was adjusted to 7. The resulting mixture was transferred into teflon-lined autoclave and heated at 180°C for 12 h. Subsequently, the mixture was then centrifuged, washed with water/methanol solution, and dried at 60°C for 8 h. Finally, the solids were calcined at 450 °C for 1 h to obtain the final BiVO<sub>4</sub> product.

### *2.2 Photocatalytic experiment*

BiVO<sub>4</sub> or BiVO<sub>4</sub>/Ag<sub>2</sub>O (50 mg) was added to 18 mg/L DC solution (250 mL). The solution was stirred in the darkness for 30 minutes and then exposed to visible light. A certain volume of solution (1 mL) was taken out at the set time and then passed through 0.22 μm filters. The residual DC concentration was detected by ultra-performance liquid chromatography (UPLC) at a wavelength of 345 nm. The solar illumination was simulated by using Xenon lamp (PLS-SXE300 Perfectlight), and visible light was obtained through a cutoff filter. The actual wavelength range was 420 nm to 780 nm. The degradation intermediates of DC were measured by UPLC-QTOF (agilent).

### *2.3 Characterization of BiVO<sub>4</sub> and BiVO<sub>4</sub>@Ag<sub>2</sub>O particles*

The crystalline phases of BiVO<sub>4</sub> and BiVO<sub>4</sub>@Ag<sub>2</sub>O particles were analyzed by XRD (D8 Advance, Bruker, Germany). The surface chemical composition and

chemical states of the samples was performed by XPS (Escalab 250Xi ThermoFisher). The morphology and particle sizes of the samples were observed by SEM (Sigma 500, Zeiss, Germany). UV-vis DRS was recorded on a Shimadzu UV-2550 spectrometer. The photogenerated electron-hole formation and separation of solid semiconductor materials were analyzed through the SS-SPS technique. The SS-SPS measurements of the samples were carried out with a home-built apparatus, equipped with a lock-in amplifier (SR830) synchronized with a light chopper (SR540).

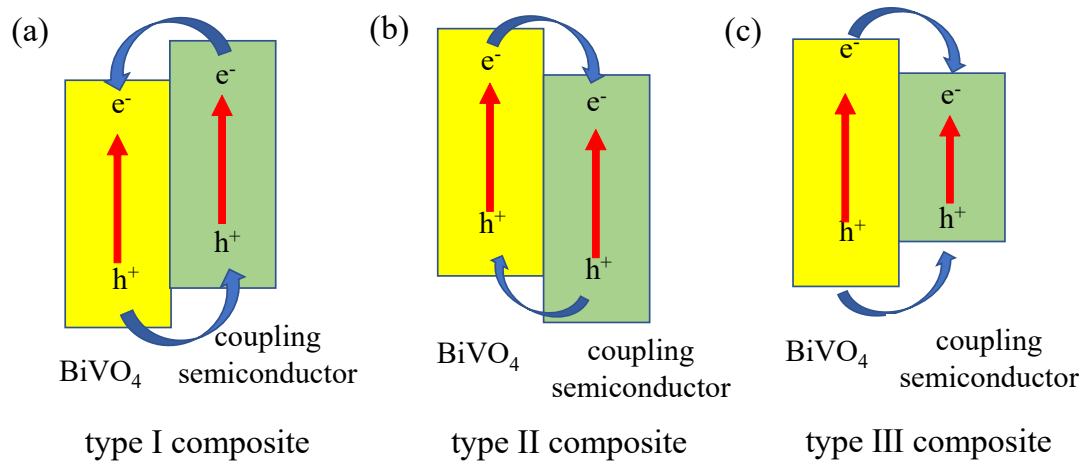

Fig. S1. Separation mechanism of  $\text{BiVO}_4$  composites

Fig. S2. MS spectra of intermediates during the degradation of DC

(1) *The intermediates in photocatalytic BiVO<sub>4</sub> system*

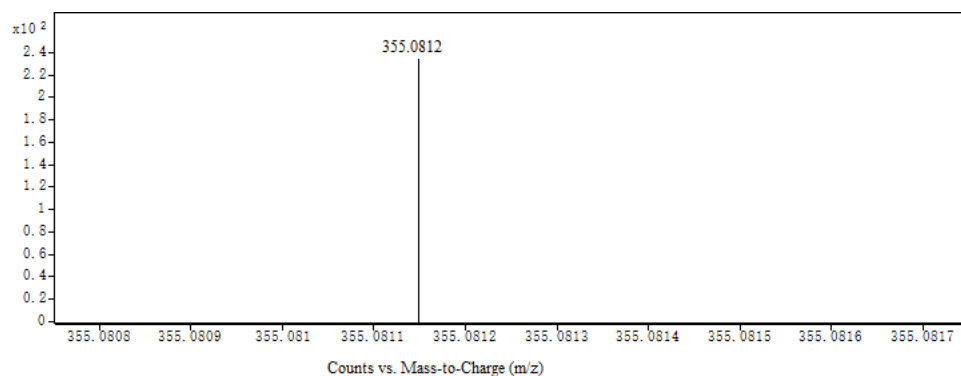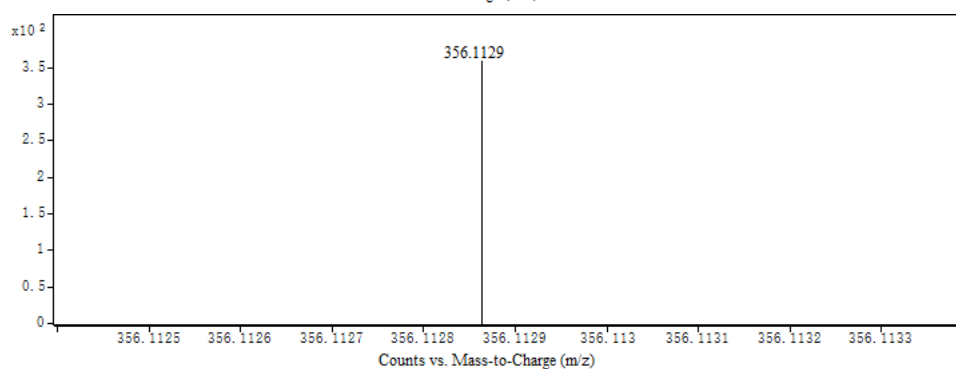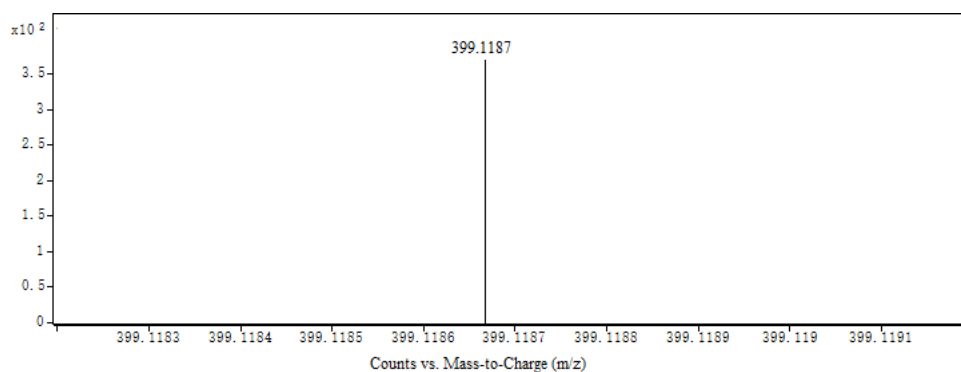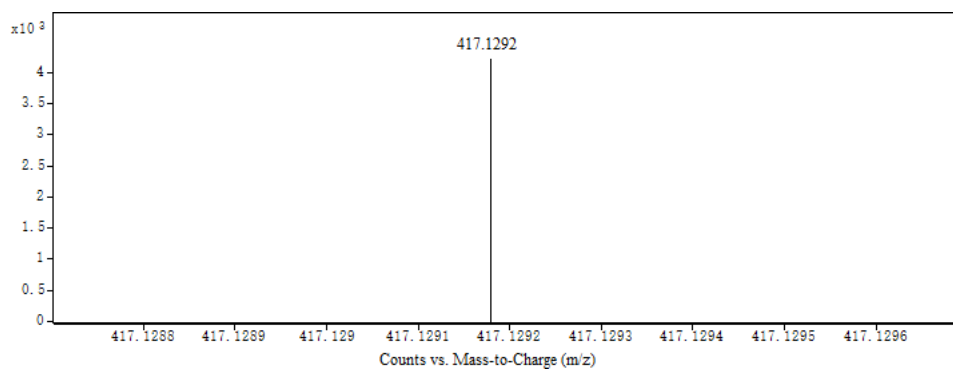

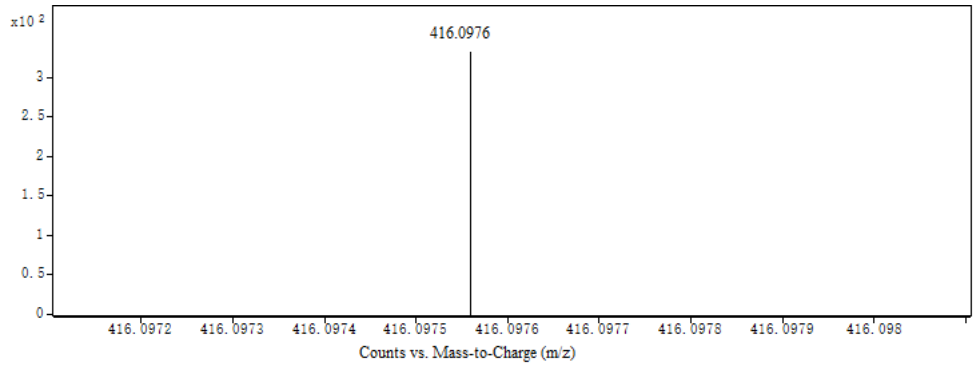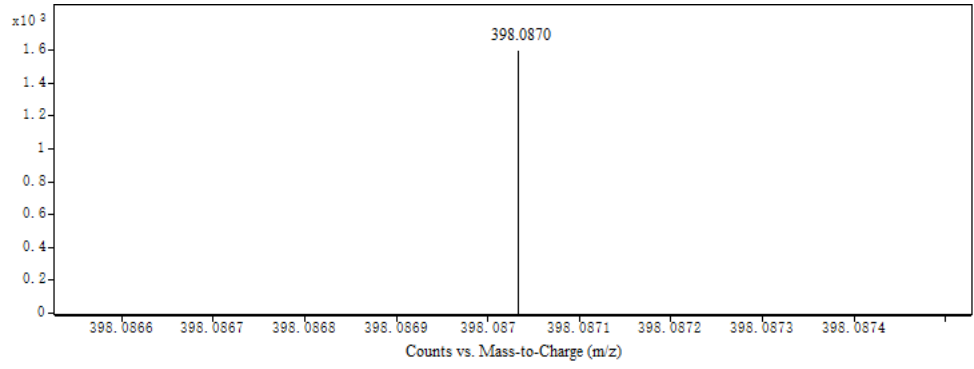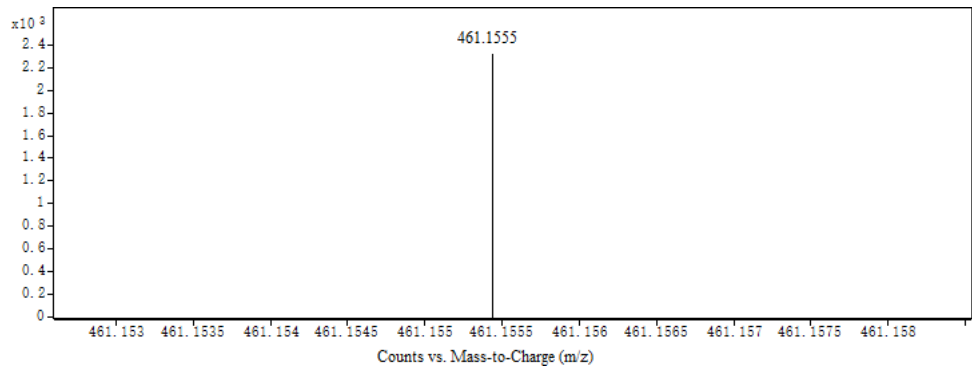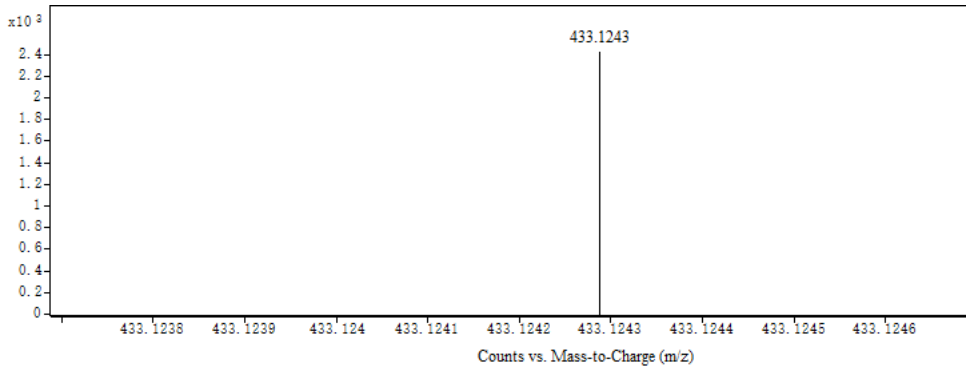

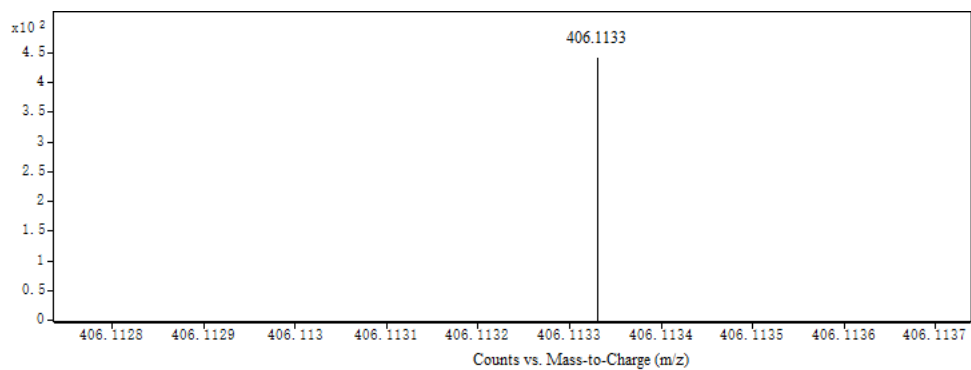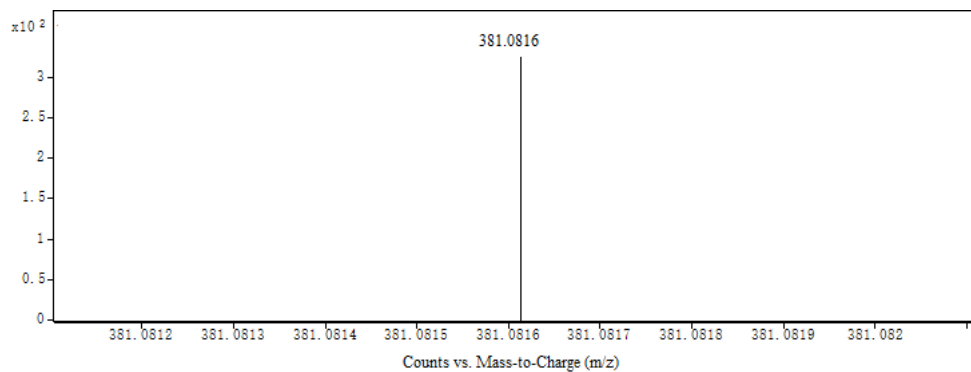

(2) *The intermediates in photocatalytic  $\text{BiVO}_4/\text{Ag}_2\text{O}$  system*

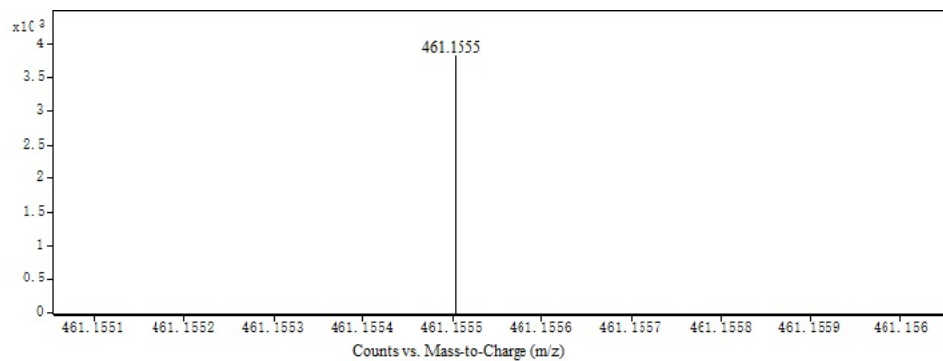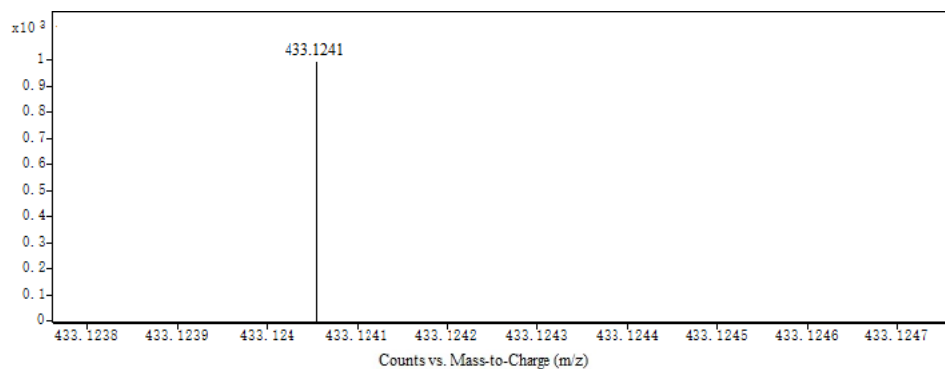

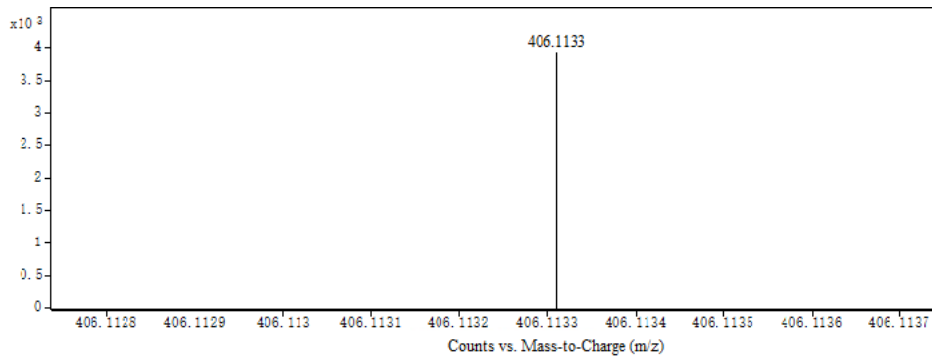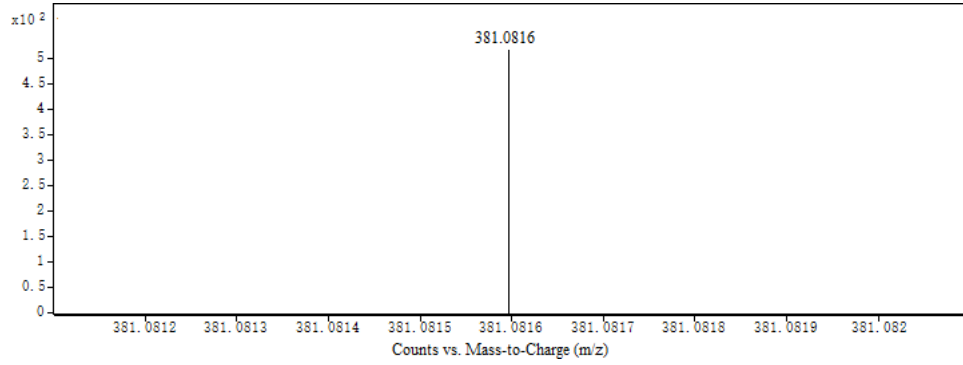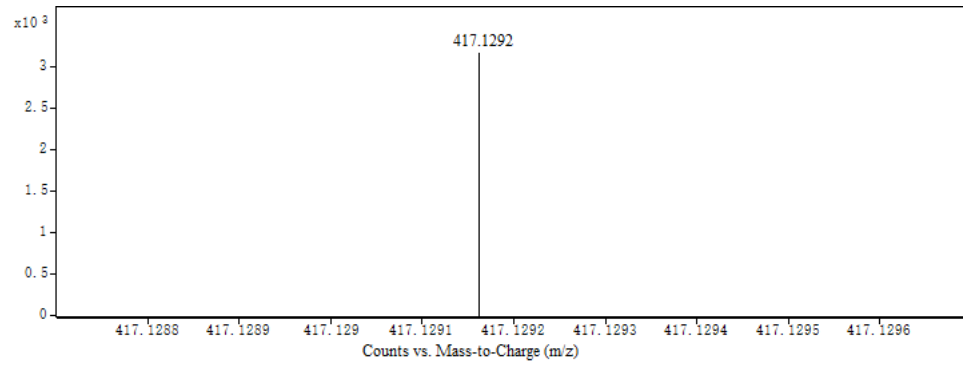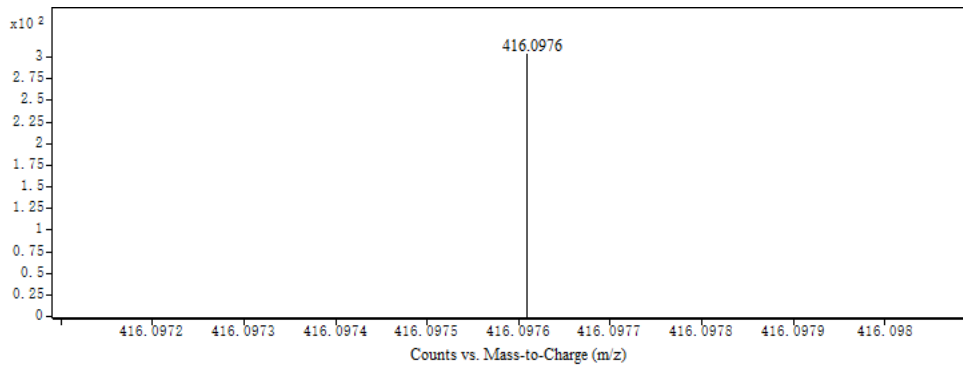



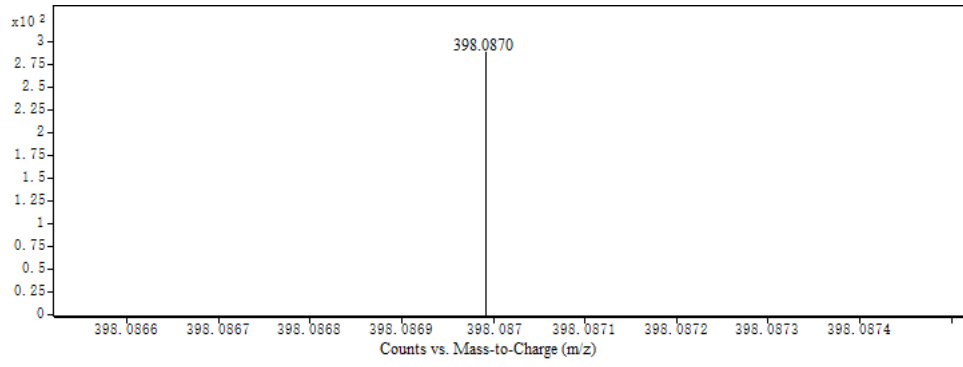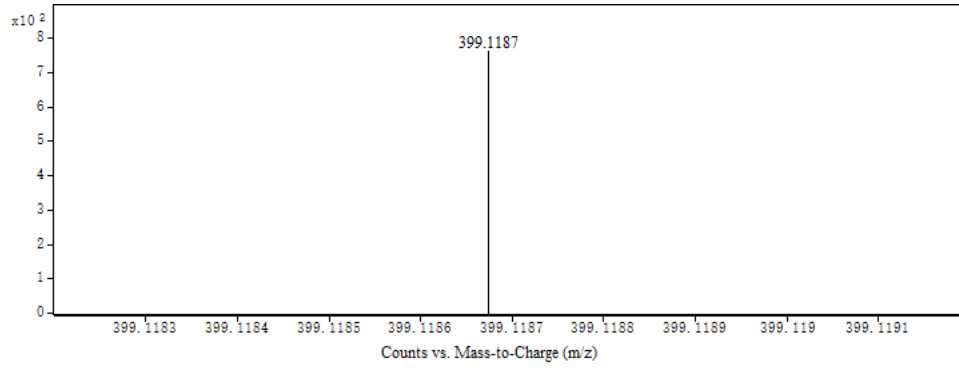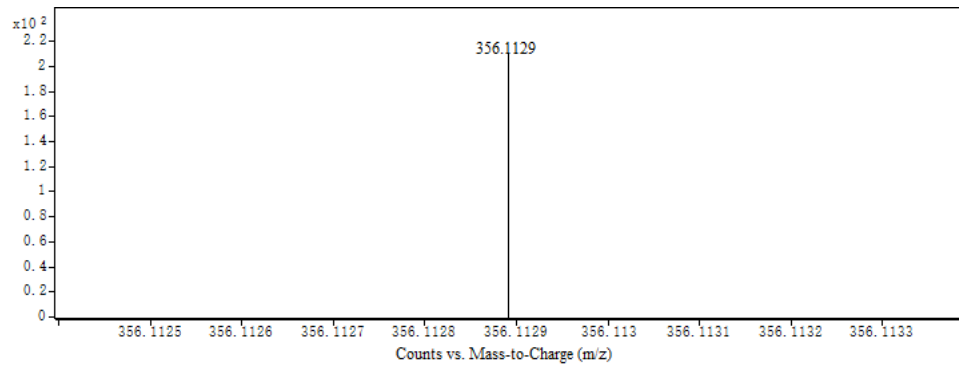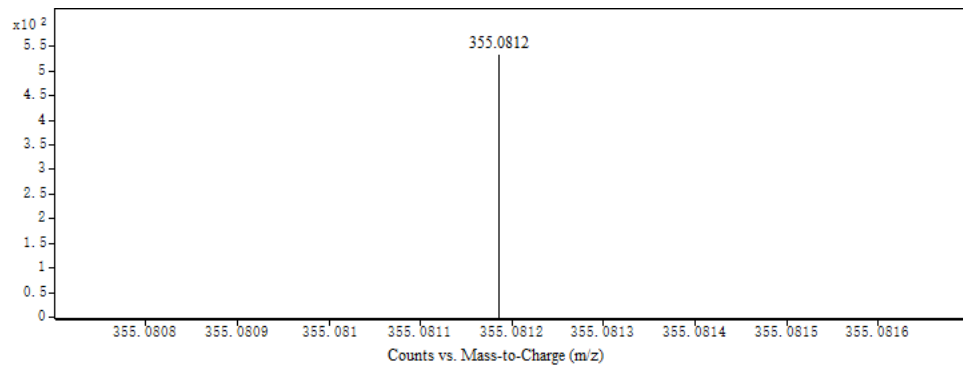

Table. S1-1 Identified intermediates of DC degradation in photocatalytic BiVO<sub>4</sub> system and photocatalytic BiVO<sub>4</sub>@Ag<sub>2</sub>O system

| Catalyst                             | Molecular formula                                             | Theoretical value<br>(m/z)<br>[M+H] | Actual value<br>(m/z)<br>[M+H] | Error<br>(ppm) |
|--------------------------------------|---------------------------------------------------------------|-------------------------------------|--------------------------------|----------------|
| BiVO <sub>4</sub>                    | C <sub>20</sub> H <sub>20</sub> N <sub>2</sub> O <sub>8</sub> | 417.1292                            | 417.1292                       | 0.0            |
|                                      | C <sub>20</sub> H <sub>17</sub> NO <sub>9</sub>               | 416.0976                            | 416.0976                       | 0.0            |
|                                      | C <sub>20</sub> H <sub>15</sub> NO <sub>8</sub>               | 398.0870                            | 398.0870                       | 0.0            |
|                                      | C <sub>20</sub> H <sub>18</sub> N <sub>2</sub> O <sub>7</sub> | 399.1187                            | 399.1187                       | 0.0            |
|                                      | C <sub>19</sub> H <sub>17</sub> NO <sub>6</sub>               | 356.1129                            | 356.1129                       | 0.0            |
|                                      | C <sub>19</sub> H <sub>14</sub> O <sub>7</sub>                | 355.0812                            | 355.0812                       | 0.0            |
|                                      | C <sub>22</sub> H <sub>24</sub> N <sub>2</sub> O <sub>9</sub> | 461.1555                            | 461.1555                       | 0.0            |
|                                      | C <sub>20</sub> H <sub>20</sub> N <sub>2</sub> O <sub>9</sub> | 433.1242                            | 433.1243                       | 0.2            |
|                                      | C <sub>19</sub> H <sub>19</sub> NO <sub>9</sub>               | 406.1133                            | 406.1133                       | 0.0            |
|                                      | C <sub>17</sub> H <sub>16</sub> O <sub>10</sub>               | 381.0816                            | 381.0816                       | 0.0            |
|                                      | C <sub>20</sub> H <sub>20</sub> N <sub>2</sub> O <sub>8</sub> | 417.1292                            | 417.1292                       | 0.0            |
|                                      | C <sub>20</sub> H <sub>17</sub> NO <sub>9</sub>               | 416.0976                            | 416.0976                       | 0.0            |
|                                      | C <sub>20</sub> H <sub>15</sub> NO <sub>8</sub>               | 398.0870                            | 398.0870                       | 0.0            |
| BiVO <sub>4</sub> @Ag <sub>2</sub> O | C <sub>20</sub> H <sub>18</sub> N <sub>2</sub> O <sub>7</sub> | 399.1187                            | 399.1187                       | 0.0            |
|                                      | C <sub>19</sub> H <sub>17</sub> NO <sub>6</sub>               | 356.1129                            | 356.1129                       | 0.0            |
|                                      | C <sub>19</sub> H <sub>14</sub> O <sub>7</sub>                | 355.0812                            | 355.0812                       | 0.0            |
|                                      | C <sub>22</sub> H <sub>24</sub> N <sub>2</sub> O <sub>9</sub> | 461.1555                            | 461.1555                       | 0.0            |
|                                      | C <sub>20</sub> H <sub>20</sub> N <sub>2</sub> O <sub>9</sub> | 433.1242                            | 433.1241                       | -0.2           |
|                                      | C <sub>19</sub> H <sub>19</sub> NO <sub>9</sub>               | 406.1133                            | 406.1133                       | 0.0            |
|                                      | C <sub>17</sub> H <sub>16</sub> O <sub>10</sub>               | 381.0816                            | 381.0816                       | 0.0            |
